# Supplementary material
Source: ML conference proceedings conference paper supplement (https://proceedings.neurips.cc/paper_files/paper/2007/hash/55a7cf9c71f1c9c495413f934dd1a158-Abstract.html)

# Colored Maximum Variance Unfolding (ID T23)

Le Song<sup>†</sup>, Alex Smola<sup>‡</sup>, Karsten Borgwardt<sup>‡</sup>, Arthur Gretton<sup>\*</sup>

<sup>†</sup>National ICT Australia, <sup>‡</sup>University of Cambridge, <sup>\*</sup>MPI for Biological Cybernetics

## Dimensionality Reduction with Side Information

### Key Idea

- .Preserve local distance structure from the data;
- .Maximally align with the side information.

### Visualizations

USPS digits with class labels

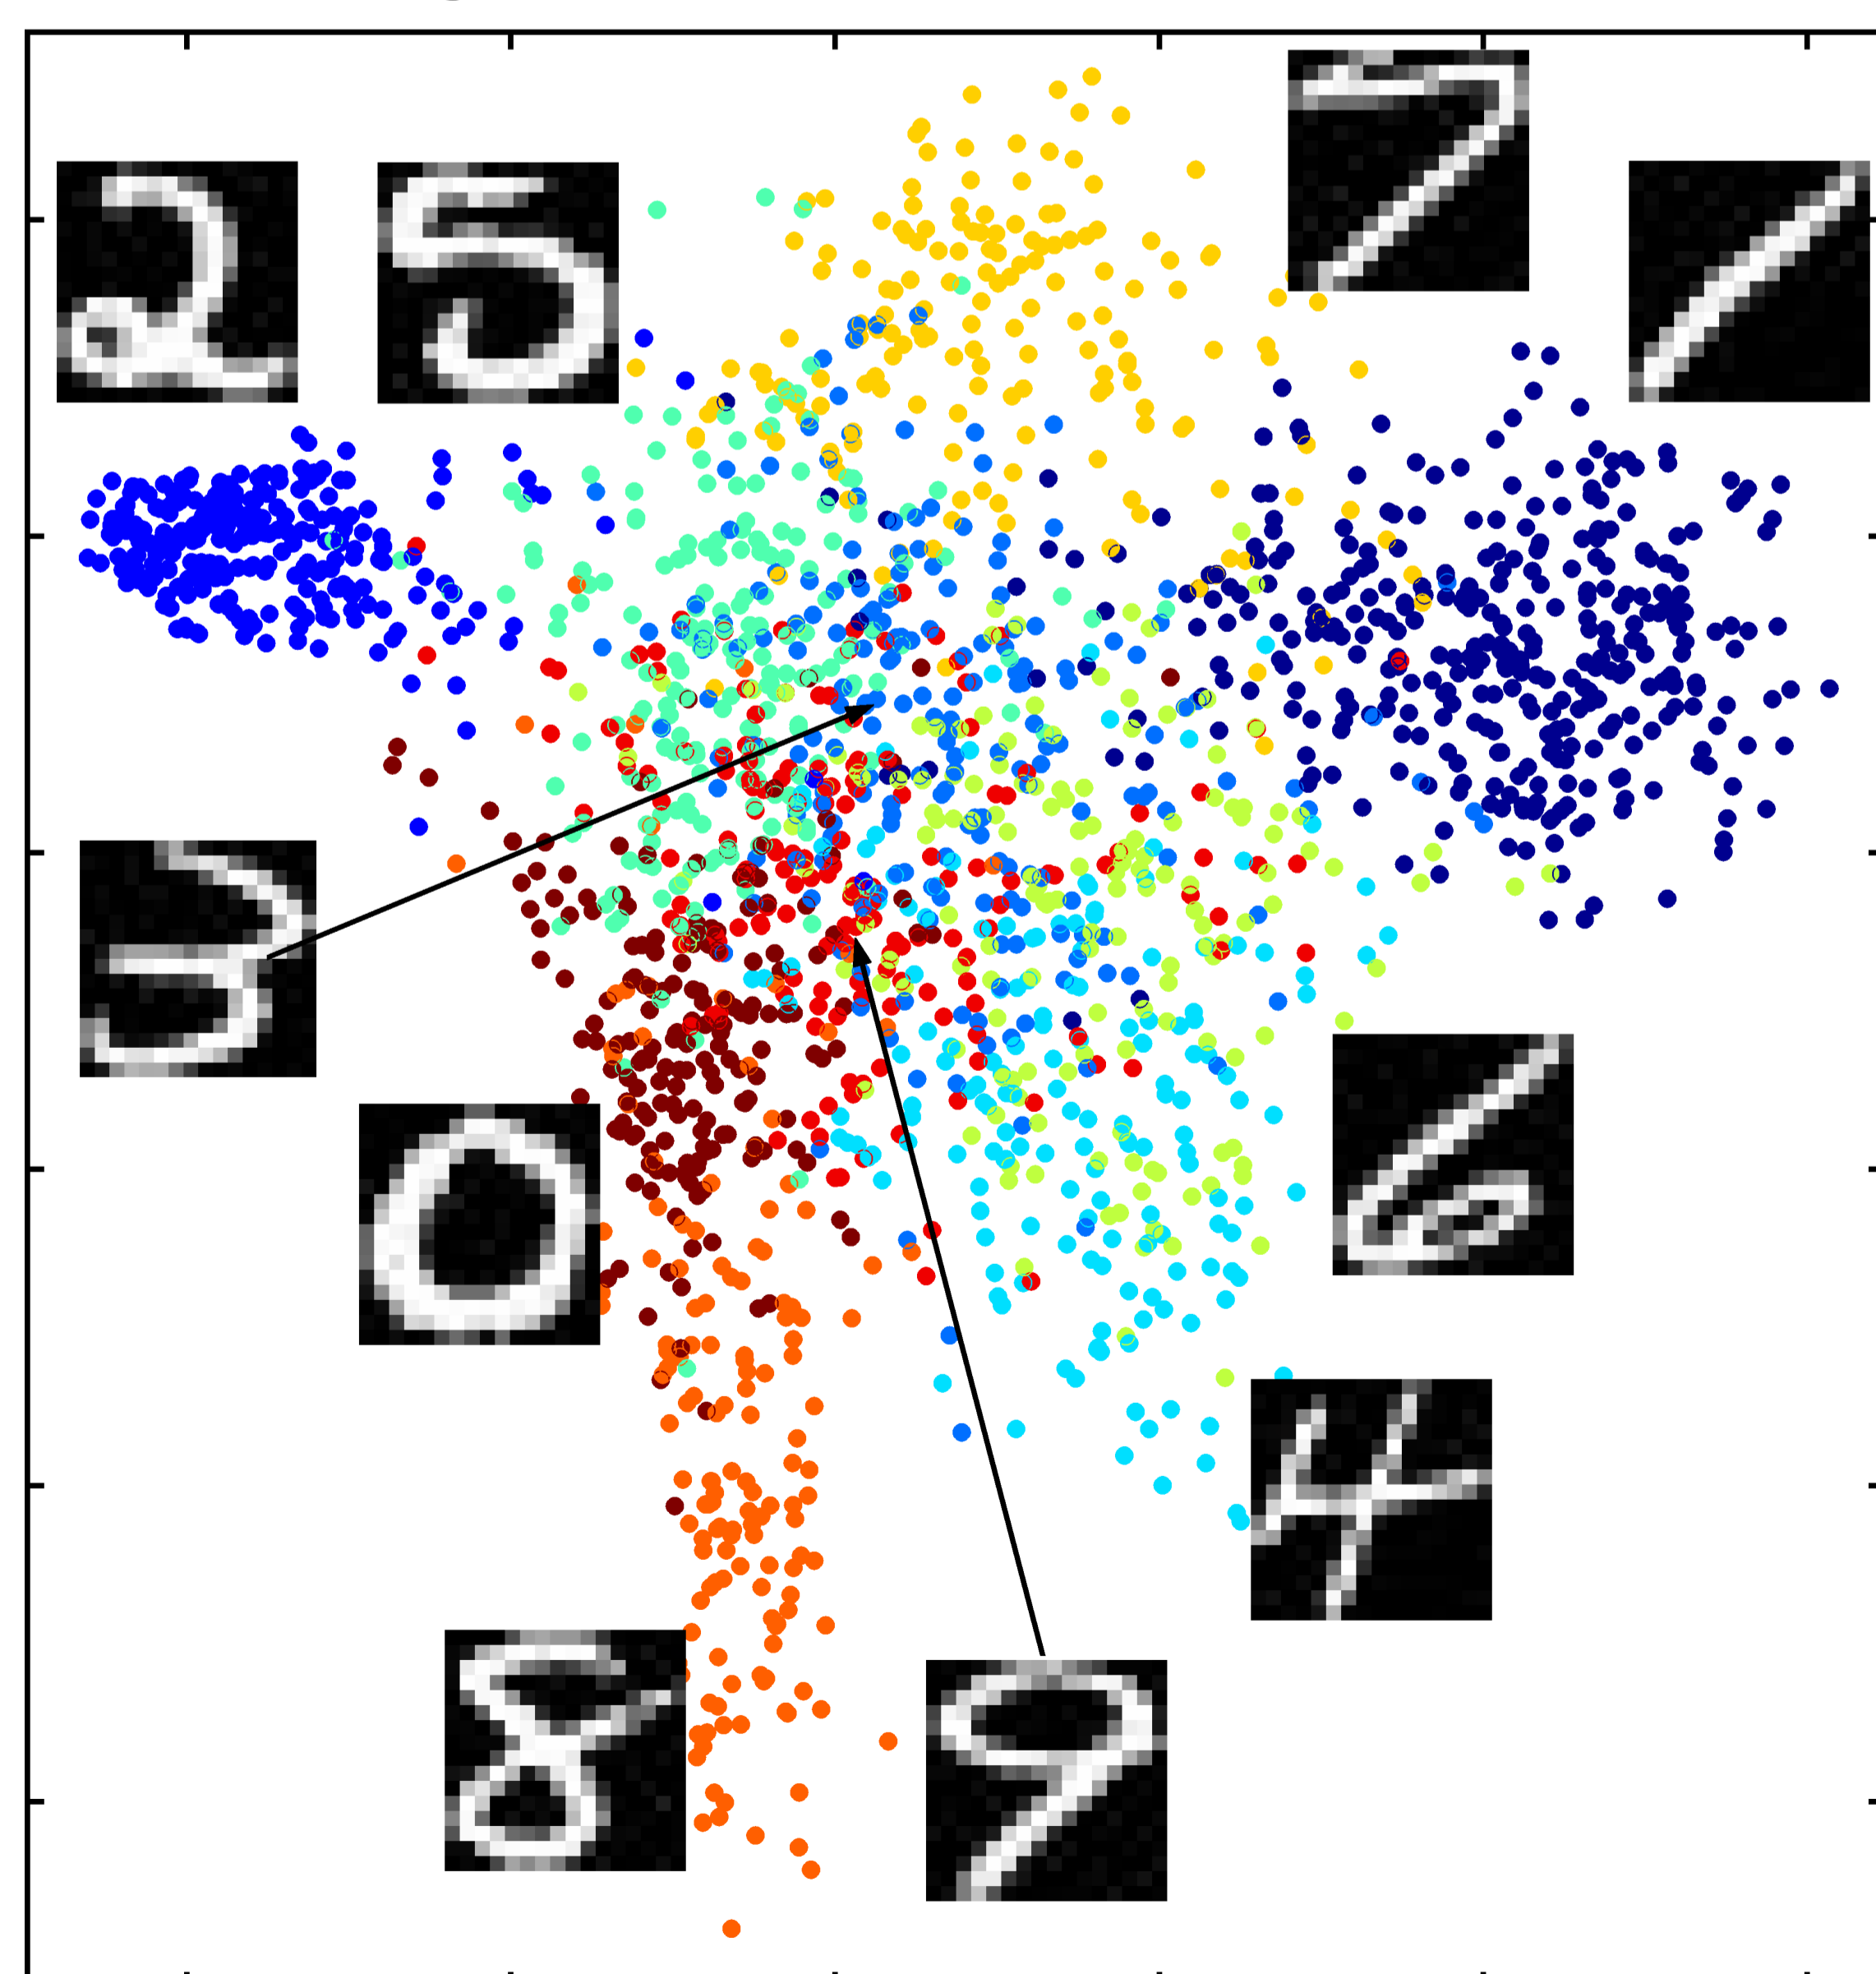

### Primal Problem

- .Maximize dependence measured by HSIC, ie.  $\text{tr } \mathbf{H} \mathbf{K} \mathbf{H} \mathbf{L}$ ;
- .Subject to constraints on distances between neighbors.

Newsgroups with class labels

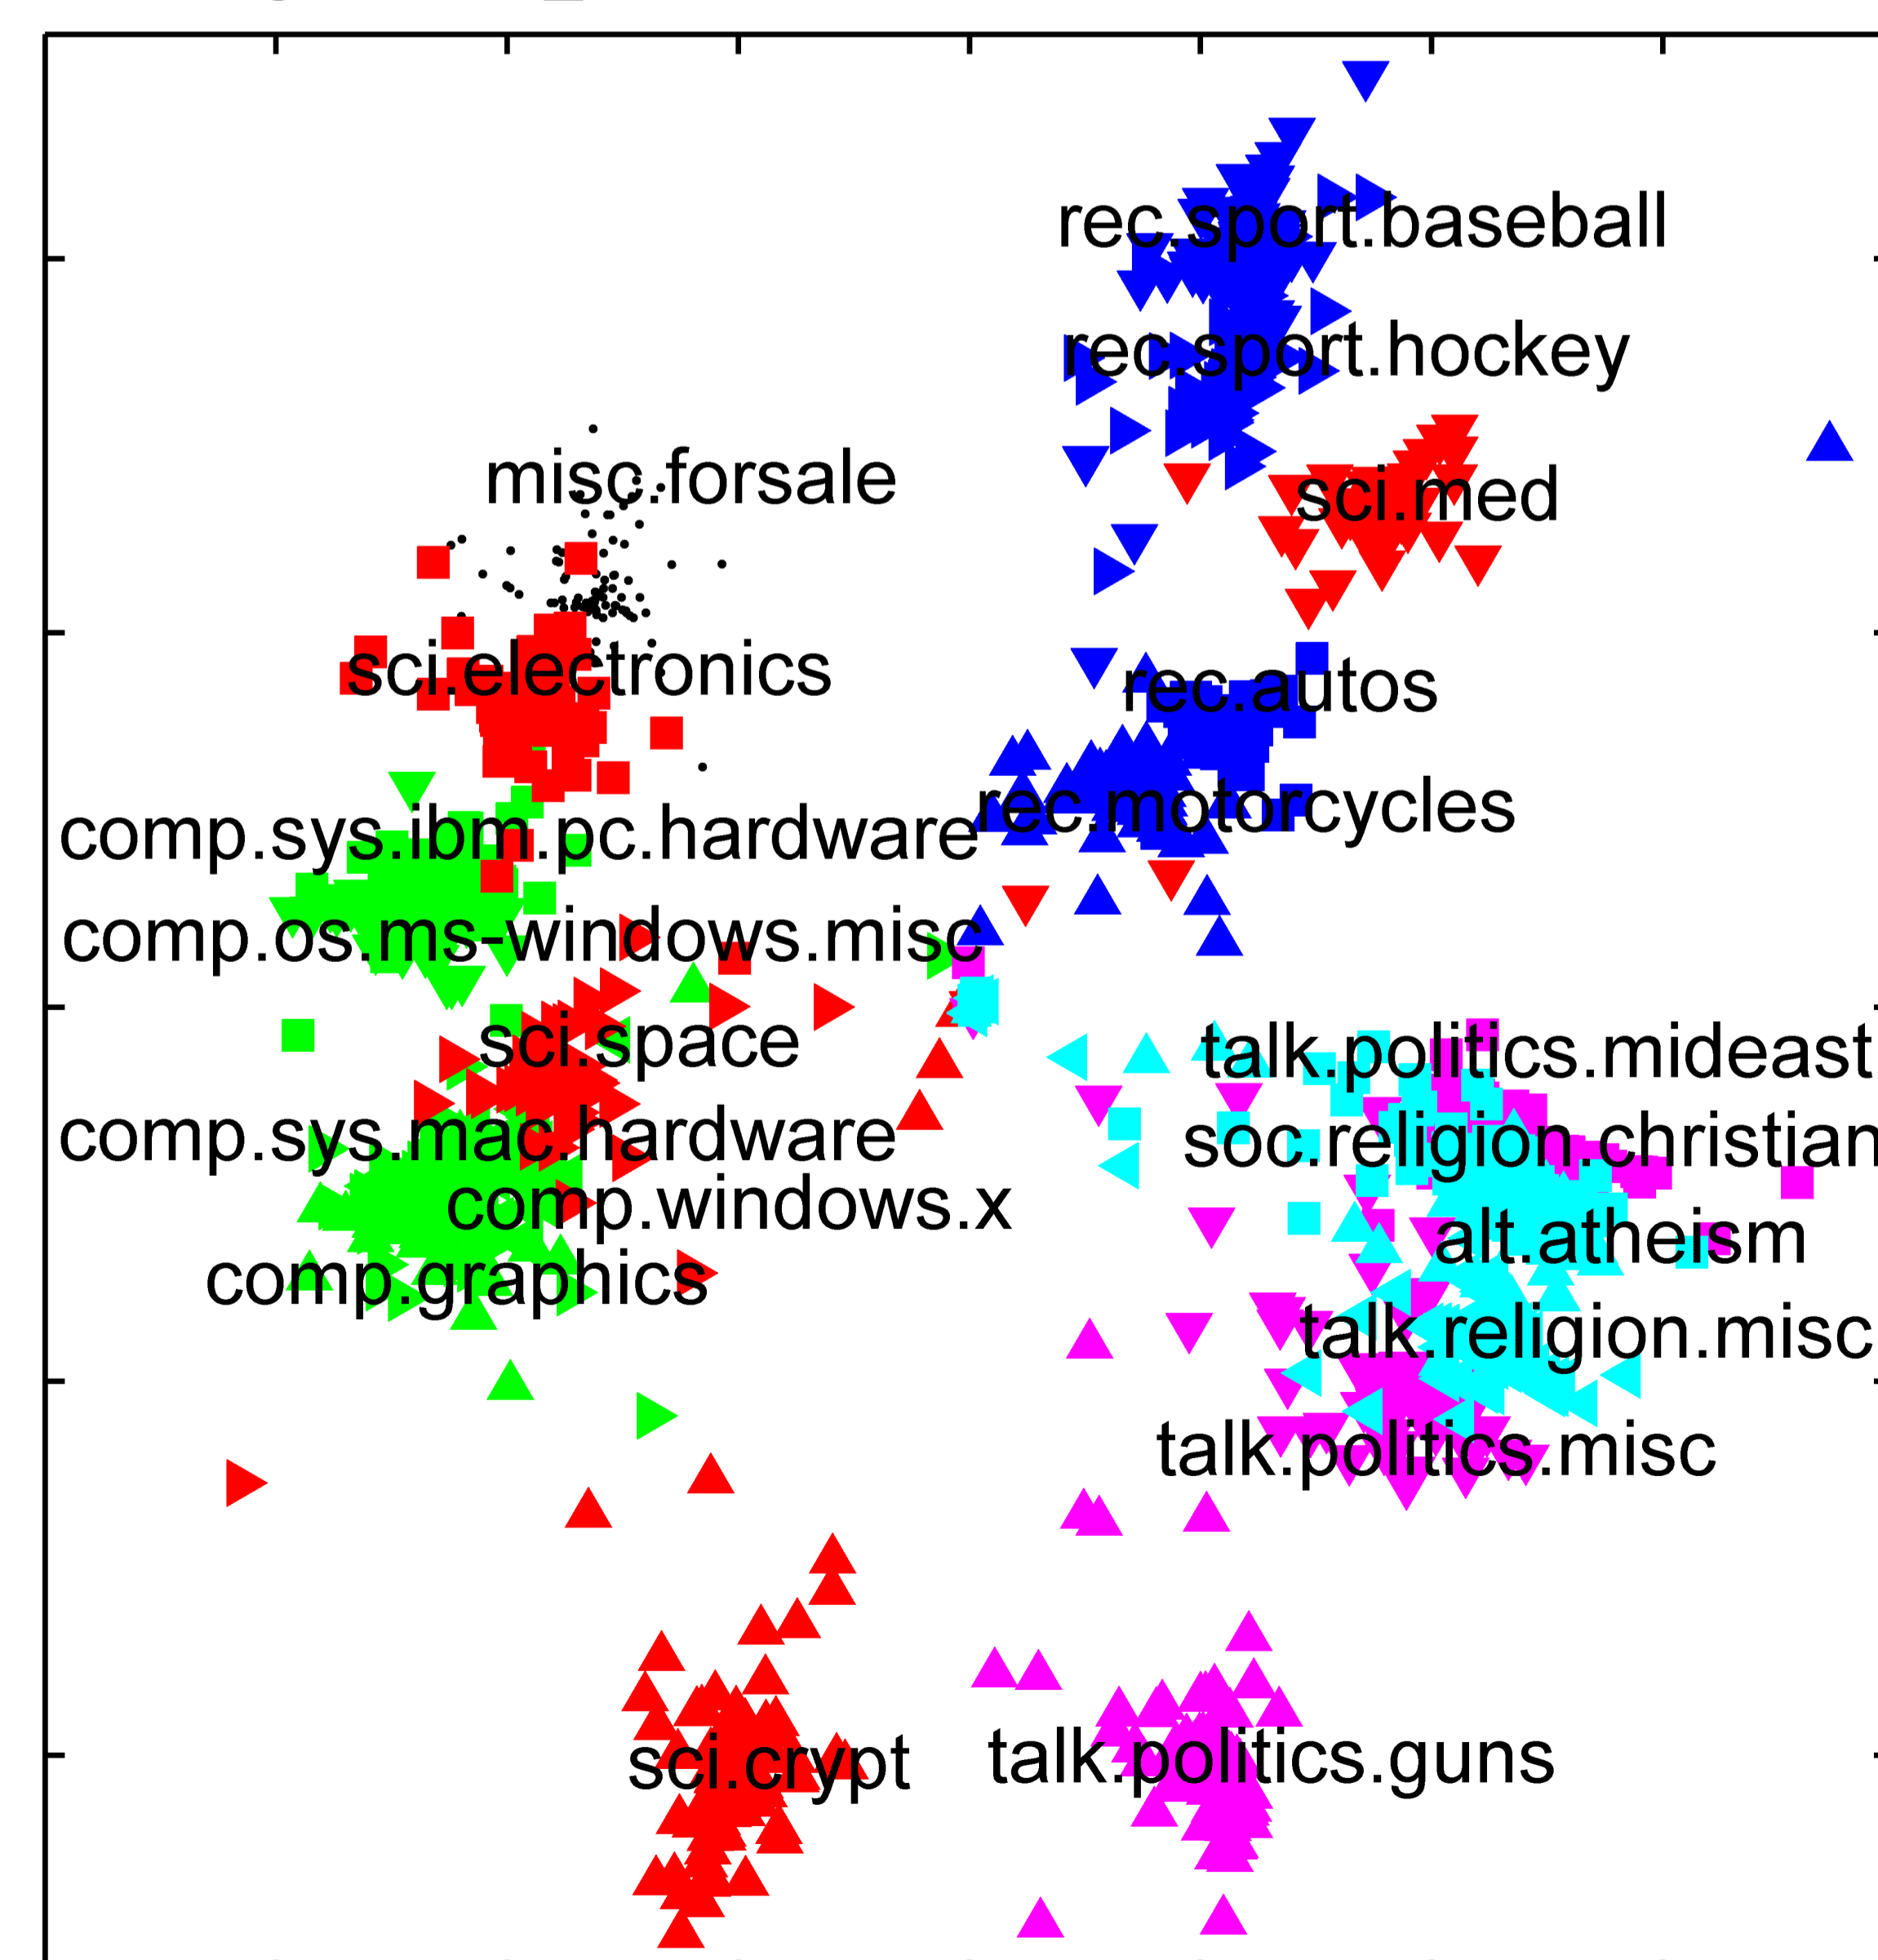

### Dual Problem

- .Learn the edge weights for the nearest neighbor graph;
- .Subject to constraints on the graph Laplacian.

NIPS papers with coauthorship

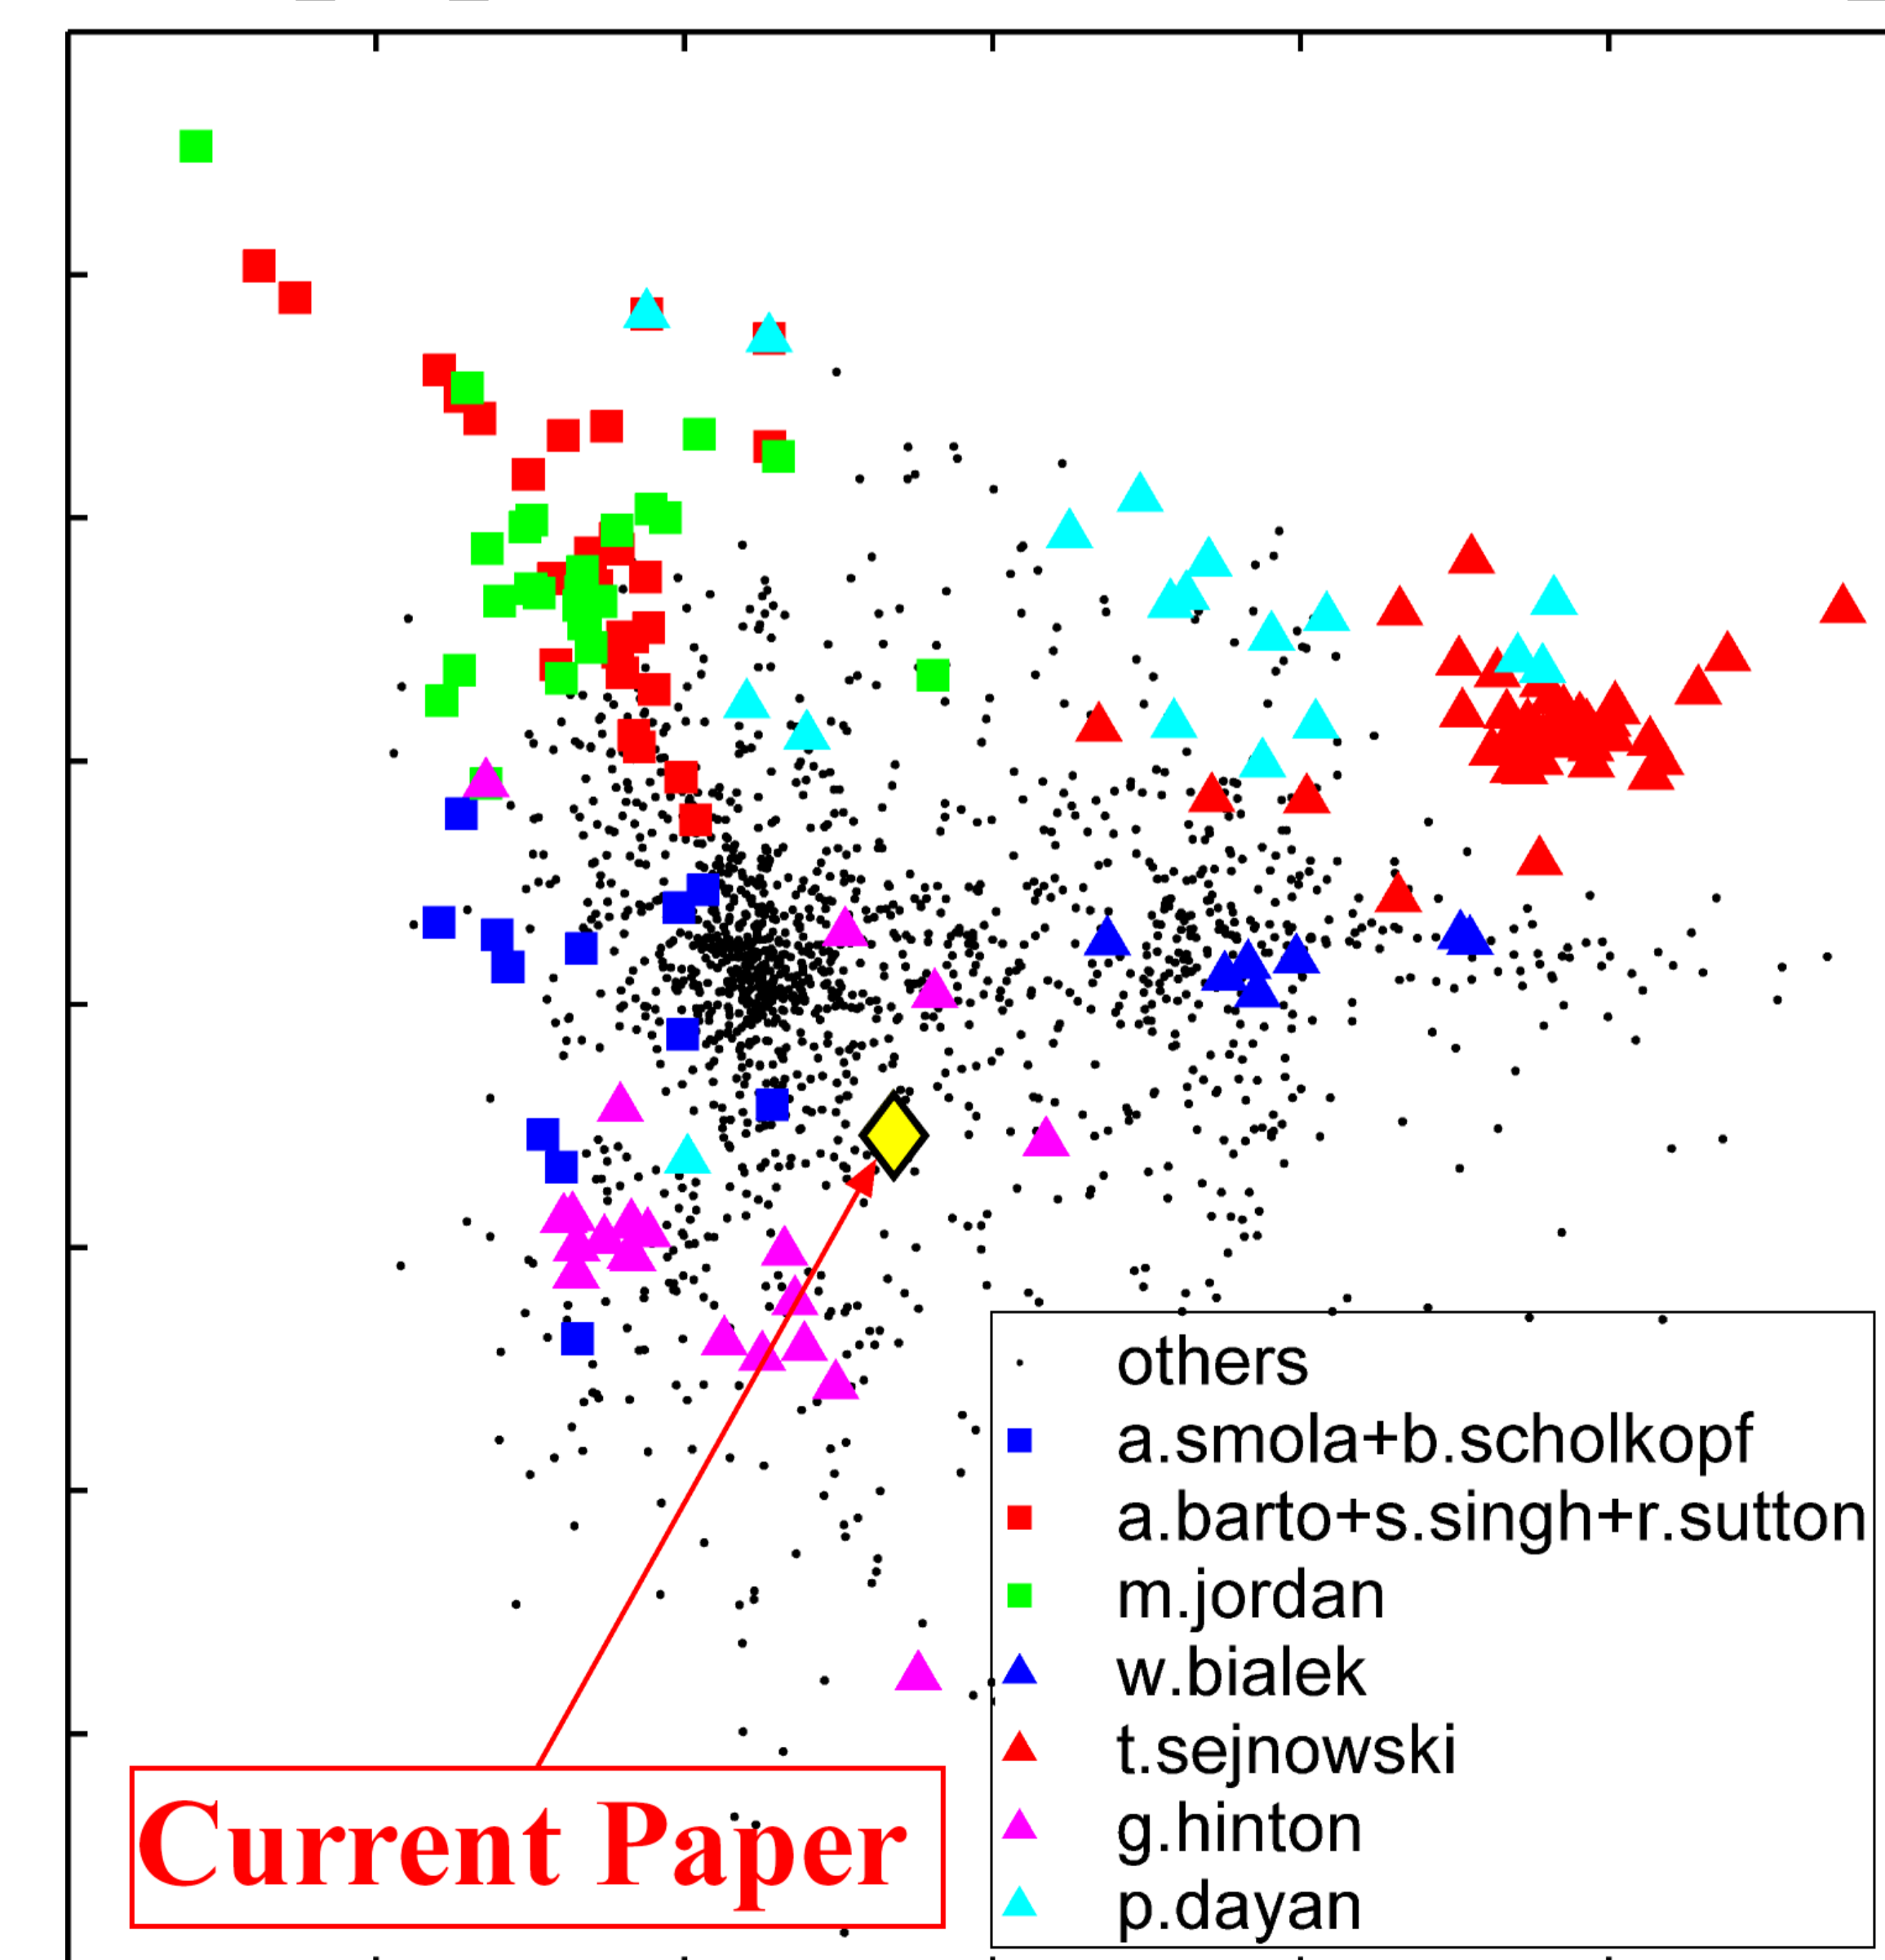

Supplement: Supplementary file [file 55a7cf9c71f1c9c495413f934dd1a158-Supplemental.zip]
